# Supplementary material for: Role and Dysregulation of miRNA in Patients with Parkinson’s Disease
Source: MDPI journal article supplement (doi:10.3390/ijms24010712), 2022-12-31
Supplement: s1 [file s1]

**Table S8.** Summary of the clinical-demographic characteristics of PD patients, along with main comorbidities and specific drug(s) taken.

| N. | Sex | Age (years) | Disease duration | Phenotype (dominant side)        | Psycho-cognitive status                     | Sleep disorder                                 | Main comorbidities                                                                                       | Total daily levodopa equivalent dose (mg) [PMID: 21069833, PMID: 32258239] |
|----|-----|-------------|------------------|----------------------------------|---------------------------------------------|------------------------------------------------|----------------------------------------------------------------------------------------------------------|----------------------------------------------------------------------------|
| 1  | M   | 71          | 6 years          | Akinetic-rigid (right>left side) | Mild cognitive impairment                   | Mild-moderate obstructive sleep apnea syndrome | Chronic subcortical vascular disease, type 2 diabetes, arterial hypertension, atrial fibrillation        | 400                                                                        |
| 2  | M   | 62          | 10 years         | Tremor dominant (R > L)          | Persistent depressive disorder with anxiety | Moderate obstructive sleep apnea syndrome      | Chronic subcortical vascular disease, bilateral carotid stenosis, type 2 diabetes, dyslipidemia, obesity | 705                                                                        |
| 3  | F   | 73          | 2 years          | Akinetic-rigid (bilateral)       | Very mild cognitive impairment              | None                                           | Arterial hypertension, hypothyroidism, bilateral sensorineural hearing loss                              | 0                                                                          |
| 4  | F   | 62          | 7 years          | Tremor dominant (bilateral)      | Memory deficit, anxiety disorder            | None                                           | Mild chronic subcortical vascular disease, left carotid stenosis, obesity                                | 0                                                                          |
| 5  | M   | 68          | 10 years         | Akinetic-rigid (L>R)             | Depressive disorder                         | None                                           | Left carotid stenosis, type 2 diabetes, dyslipidemia, bilateral sensorineural hearing loss               | 400                                                                        |
| 6  | F   | 71          | 5 years          | Akinetic-rigid (bilateral)       | Normal                                      | None                                           | Arterial hypertension                                                                                    | 800                                                                        |
| 7  | M   | 61          | 1 year           | Mixed (R>L)                      | Normal                                      | None                                           | Dyslipidemia                                                                                             | 26                                                                         |
| 8  | M   | 68          | 5 years          | Akinetic-rigid (bilateral)       | Mild memory deficit                         | None                                           | Arterial hypertension, bilateral sensorineural hearing loss (R>L), benign prostatic hyperplasia          | 550                                                                        |
| 9  | M   | 71          | 2 years          | Mixed, > akinetic/rigid (R>L)    | Mild cognitive impairment                   | None                                           | Atrial fibrillation, chronic coronary artery disease                                                     | 300                                                                        |
| 10 | M   | 61          | 2 years          | Akinetic/rigid (R>L)             | Normal                                      | Periodic limb movements during sleep           | Arterial hypertension, obesity, bilateral sensorineural hearing loss                                     | 68                                                                         |

|    |   |    |          |                            |                                |                                                                        |                                                                                                                                                                               |       |
|----|---|----|----------|----------------------------|--------------------------------|------------------------------------------------------------------------|-------------------------------------------------------------------------------------------------------------------------------------------------------------------------------|-------|
| 11 | M | 63 | 6 years  | Mixed (L>R)                | Normal                         | Obstructive sleep apnea syndrome                                       | Arterial hypertension, obesity, hypothyroidism, bilateral sensorineural hearing loss (L>R)                                                                                    | 720   |
| 12 | F | 66 | 15 years | Mixed (L>R)                | Persistent depressive disorder | Insomnia                                                               | Dyslipidemia                                                                                                                                                                  | 585   |
| 13 | F | 72 | 9 years  | Akinetic-rigid (R>L)       | Normal                         | None                                                                   | Arterial hypertension                                                                                                                                                         | 1,050 |
| 14 | F | 69 | 4 years  | Akinetic-rigid (R>L)       | Mild cognitive impairment      | None                                                                   | Lacunar cerebrovascular disease, multiple disk protrusions, osteoporosis, psoriatic arthritis                                                                                 | 250   |
| 15 | M | 74 | 2 years  | Akinetic-rigid (bilateral) | Severe dementia                | REM-sleep behavior disorder; moderate obstructive sleep apnea syndrome | Chronic subcortical vascular disease, arterial hypertension                                                                                                                   | 1,200 |
| 16 | M | 76 | 6 years  | Mixed (R>L)                | Mild dementia                  | REM-sleep behavior disorder; obstructive sleep apnea syndrome          | Chronic cortical-subcortical vascular diseases, bilateral carotid stenosis, chronic obstructive pulmonary disease, non-Hodgkin lymphoma, bilateral sensorineural hearing loss | 615   |
