# Supplementary material for: Role and Dysregulation of miRNA in Patients with Parkinson’s Disease
Source: MDPI journal article supplement (doi:10.3390/ijms24010712), 2022-12-31
Supplement: s1 [file s1]

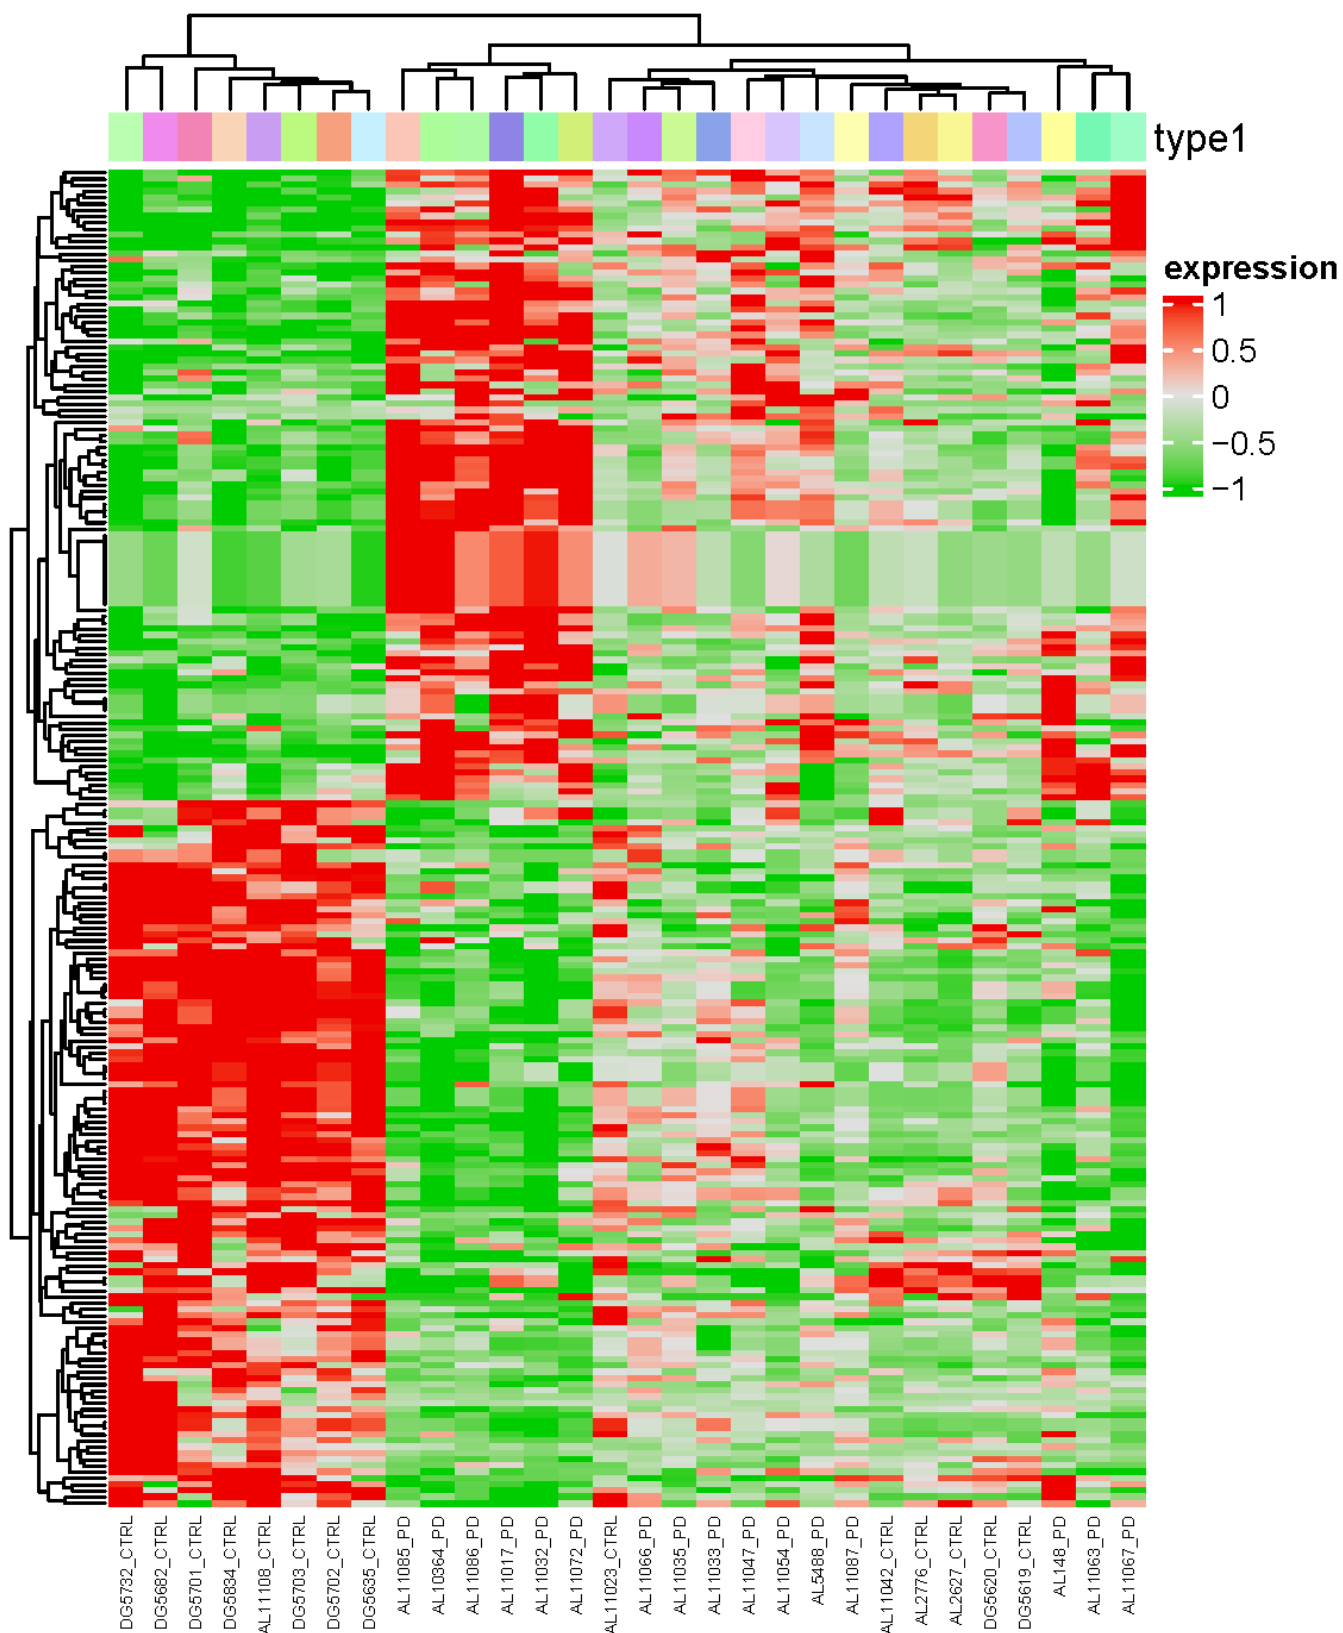

**Figure S1.** miRNA profiling. Heatmap of the unsupervised hierarchical clustering analysis on the expression profiles of the of differentially miRNAs ( $\text{padj} \leq 0.05$  and  $|\text{FC}| \geq 1.5$ ) in Parkinson's disease patients compared to healthy controls. Expression values lower or higher than the median are shown in green or red, respectively. Red: over-expressed miRNAs; green: downexpressed miRNAs.
